# Supplementary material for: Incidence and Impact of Acute Pericarditis in Hospitalized Patients With COVID‐19
Source: PubMed Central journal article supplement — J Am Heart Assoc. 2023 Oct 17;12(20):e028970. doi: 10.1161/JAHA.122.028970 (PMC10757531; doi:10.1161/jaha.122.028970), 2023-10-17
Supplement: JAH3-12-e028970-s001.pdf [file JAH3-12-e028970-s001.pdf]

# **SUPPLEMENTAL MATERIAL**

**Table S1. International Classification of Disease, 10th edition, Clinical Modification**

**(ICD-10-CM) Codes Used for Comorbidities and Complications.**

---

| <b>Comorbidities/Complications</b> | <b>ICD-10-CM Code</b>             |
|------------------------------------|-----------------------------------|
| Acute pericarditis                 | I30, I312-I314, I318, I319, I32   |
| COVID-19                           | U071                              |
| <b>Comorbidities</b>               |                                   |
| Smoking                            | F17-F17299, Z720, Z87891          |
| Hypertension                       | I10, I15-I159                     |
| Diabetes mellitus                  | E10-E109, E11-E119, E13-E139      |
| Hyperlipidemia                     | E780-E785                         |
| Obesity                            | Z683-Z6839, Z684-Z6845, E66-E669  |
| Anxiety                            | F064, F40-F409, F41-F419          |
| Depression                         | F32-F329, F33-F339, F341          |
| OSA                                | G473-G4739                        |
| CKD                                | N18-N189                          |
| COPD                               | J41-J418, J42, J43-J439, J44-J449 |
| Anemia                             | D50-D59, D60-D64                  |
| Cancer                             | C00-C969, D00-D099                |
| SLE                                | M32                               |
| Rheumatoid arthritis               | M05, M06                          |

---

---

|                           |                                          |
|---------------------------|------------------------------------------|
| Systemic sclerosis        | M34                                      |
| Sjögren’s syndrome        | M35.0                                    |
| IBD                       | K50, K51                                 |
| <b>Complications</b>      |                                          |
| Cardiac arrest            | I46-I469                                 |
| Cardiogenic shock         | R570                                     |
| Ventricular arrhythmia    | I472, I490-I4902                         |
| Acute kidney injury       | N17-N179                                 |
| Acute respiratory failure | J960-J9622                               |
| ACHF                      | I5021, I5031, I5041, I5023, I5033, I5043 |
| Cardiac tamponade         | I319                                     |

---

ACHF, acute congestive heart failure; CKD, chronic kidney disease; COPD, chronic obstructive pulmonary disease; COVID-19, Coronavirus disease 2019; IBD, inflammatory bowel disease; ICD-10-CM codes: International Classification of Diseases, 10th edition, Clinical Modification codes; OSA, obstructive sleep apnea; SLE, systemic lupus erythematosus

**Table S2. Baseline Characteristics.**

| Variables                                                         | Unmatched Cohort                       |                                     |                | Propensity-Matched Cohort              |                                     |                |
|-------------------------------------------------------------------|----------------------------------------|-------------------------------------|----------------|----------------------------------------|-------------------------------------|----------------|
|                                                                   | Acute Pericarditis<br>without COVID-19 | Acute Pericarditis<br>with COVID-19 | <i>P</i> Value | Acute Pericarditis<br>without COVID-19 | Acute Pericarditis<br>with COVID-19 | <i>P</i> Value |
| <b>n</b>                                                          | 45,053                                 | 1,860                               |                | 5,554                                  | 1,856                               |                |
| <b>Age, (mean (SD))</b>                                           | 61.52 (19.37)                          | 59.15 (19.42)                       | <0.001         | 59.18 (20.82)                          | 59.17 (19.43)                       | 0.99           |
| <b>Sex, n (%)</b>                                                 |                                        |                                     | 0.01           |                                        |                                     | 0.86           |
| Male                                                              | 22,092 (49.0)                          | 980 (52.7)                          |                | 2,939 (52.9)                           | 977 (52.6)                          |                |
| Female                                                            | 22,956 (51.0)                          | 880 (47.3)                          |                | 2,615 (47.1)                           | 879 (47.4)                          |                |
| Unknown                                                           | 5 (0.0)                                | 0 (0.0)                             |                | 0 (0.0)                                | 0 (0.0)                             |                |
| <b>Race, n (%)</b>                                                |                                        |                                     | <0.001         |                                        |                                     | 0.99           |
| White                                                             | 27,694 (61.5)                          | 768 (41.3)                          |                | 2,283 (41.1)                           | 768 (41.4)                          |                |
| African American                                                  | 8,602 (19.1)                           | 500 (26.9)                          |                | 1,494 (26.9)                           | 499 (26.9)                          |                |
| Hispanic                                                          | 4,662 (10.3)                           | 383 (20.6)                          |                | 1,155 (20.8)                           | 380 (20.5)                          |                |
| Asian/<br>Pacific Islander                                        | 1,328 (2.9)                            | 59 (3.2)                            |                | 186 (3.3)                              | 59 (3.2)                            |                |
| Native American                                                   | 242 (0.5)                              | 11 (0.6)                            |                | 36 (0.6)                               | 11 (0.6)                            |                |
| Other                                                             | 1,416 (3.1)                            | 87 (4.7)                            |                | 261 (4.7)                              | 87 (4.7)                            |                |
| Unknown                                                           | 1,109 (2.5)                            | 52 (2.8)                            |                | 139 (2.5)                              | 52 (2.8)                            |                |
| <b>Patient location, n (%)</b>                                    |                                        |                                     | <0.001         |                                        |                                     | 0.99           |
| "Central" counties of<br>metro areas of >=1 million<br>population | 14,139 (31.4)                          | 720 (38.7)                          |                | 2,184 (39.3)                           | 716 (38.6)                          |                |
| "Fringe" counties of<br>metro areas of >=1 million<br>population  | 11,455 (25.4)                          | 433 (23.3)                          |                | 1,292 (23.3)                           | 433 (23.3)                          |                |

|                                                       |               |            |        |              |            |      |
|-------------------------------------------------------|---------------|------------|--------|--------------|------------|------|
| Counties in metro areas of 250,000-999,999 population | 8,973 (19.9)  | 334 (18.0) |        | 967 (17.4)   | 334 (18.0) |      |
| Counties in metro areas of 50,000-249,999 population  | 3,832 (8.5)   | 137 (7.4)  |        | 411 (7.4)    | 137 (7.4)  |      |
| Micropolitan counties                                 | 3,729 (8.3)   | 118 (6.3)  |        | 353 (6.4)    | 118 (6.4)  |      |
| Non-metropolitan or micropolitan counties             | 2,684 (6.0)   | 104 (5.6)  |        | 298 (5.4)    | 104 (5.6)  |      |
| NA                                                    | 241 (0.5)     | 14 (0.8)   |        | 49 (0.9)     | 14 (0.8)   |      |
| <b>Mean household income, n (%)</b>                   |               |            | <0.001 |              |            | 0.98 |
| \$1-\$42,999                                          | 13,393 (29.7) | 642 (34.5) |        | 1,910 (34.4) | 640 (34.5) |      |
| \$43,000-\$53,999                                     | 11,706 (26.0) | 504 (27.1) |        | 1,508 (27.2) | 504 (27.2) |      |
| \$54,000-\$70,999                                     | 10,036 (22.3) | 386 (20.8) |        | 1,163 (20.9) | 384 (20.7) |      |
| \$71,000 or more                                      | 9,164 (20.3)  | 299 (16.1) |        | 875 (15.8)   | 299 (16.1) |      |
| Unknown                                               | 754 (1.7)     | 29 (1.6)   |        | 98 (1.8)     | 29 (1.6)   |      |
| <b>Primary payer, n (%)</b>                           |               |            | <0.001 |              |            | 0.99 |
| Medicare                                              | 24,424 (54.2) | 908 (48.8) |        | 2,717 (48.9) | 908 (48.9) |      |
| Medicaid                                              | 6,916 (15.4)  | 333 (17.9) |        | 1,023 (18.4) | 333 (17.9) |      |
| Private including HMO                                 | 10,766 (23.9) | 455 (24.5) |        | 1,318 (23.7) | 455 (24.5) |      |
| Self-pay                                              | 1,626 (3.6)   | 64 (3.4)   |        | 200 (3.6)    | 64 (3.4)   |      |
| No charge                                             | 140 (0.3)     | 10 (0.5)   |        | 33 (0.6)     | 10 (0.5)   |      |
| Other                                                 | 1,126 (2.5)   | 82 (4.4)   |        | 240 (4.3)    | 80 (4.3)   |      |
| Unknown                                               | 55 (0.1)      | 8 (0.4)    |        | 23 (0.4)     | 6 (0.3)    |      |
| <b>Hospital type, n (%)</b>                           |               |            | 0.68   |              |            | 0.81 |

|                                 |               |              |        |              |              |      |
|---------------------------------|---------------|--------------|--------|--------------|--------------|------|
| Rural                           | 2,121 (4.7)   | 84 (4.5)     |        | 232 (4.2)    | 84 (4.5)     |      |
| Urban non-teaching              | 6,380 (14.2)  | 276 (14.8)   |        | 831 (15.0)   | 275 (14.8)   |      |
| Urban teaching                  | 36,552 (81.1) | 1,500 (80.6) |        | 4,491 (80.9) | 1,497 (80.7) |      |
| <b>Hospital Region, n (%)</b>   |               |              | 0.36   |              |              | 0.98 |
| Northeast                       | 8,459 (18.8)  | 366 (19.7)   |        | 1,105 (19.9) | 365 (19.7)   |      |
| Midwest                         | 9,758 (21.7)  | 402 (21.6)   |        | 1,193 (21.5) | 401 (21.6)   |      |
| South                           | 18,118 (40.2) | 761 (40.9)   |        | 2,247 (40.5) | 759 (40.9)   |      |
| West                            | 8,718 (19.4)  | 331 (17.8)   |        | 1,009 (18.2) | 331 (17.8)   |      |
| <b>Hospital Bed Size, n (%)</b> |               |              | 0.43   |              |              | 0.93 |
| Small                           | 8,187 (18.2)  | 360 (19.4)   |        | 1,064 (19.2) | 358 (19.3)   |      |
| Medium                          | 11,927 (26.5) | 485 (26.1)   |        | 1,432 (25.8) | 485 (26.1)   |      |
| Large                           | 24,939 (55.4) | 1,015 (54.6) |        | 3,058 (55.1) | 1,013 (54.6) |      |
| <b>Comorbidities, n (%)</b>     |               |              |        |              |              |      |
| Smoking                         | 16,270 (36.1) | 431 (23.2)   | <0.001 | 1,349 (24.3) | 431 (23.2)   | 0.37 |
| Hypertension                    | 10,226 (22.7) | 422 (22.7)   | 1.00   | 1,231 (22.2) | 418 (22.5)   | 0.77 |
| Diabetes mellitus               | 14,502 (32.2) | 741 (39.8)   | <0.001 | 2,164 (39.0) | 738 (39.8)   | 0.56 |
| Hyperlipidemia                  | 19,547 (43.4) | 692 (37.2)   | <0.001 | 2,048 (36.9) | 691 (37.2)   | 0.81 |
| Obesity                         | 9,039 (20.1)  | 448 (24.1)   | <0.001 | 1,313 (23.6) | 447 (24.1)   | 0.72 |
| Anxiety                         | 6,576 (14.6)  | 203 (10.9)   | <0.001 | 619 (11.1)   | 201 (10.8)   | 0.74 |
| Depression                      | 5,318 (11.8)  | 165 (8.9)    | <0.001 | 501 (9.0)    | 165 (8.9)    | 0.90 |
| OSA                             | 4,896 (10.9)  | 148 (8.0)    | <0.001 | 460 (8.3)    | 148 (8.0)    | 0.71 |
| Chronic kidney disease          | 14,239 (31.6) | 567 (30.5)   | 0.32   | 1,666 (30.0) | 567 (30.5)   | 0.67 |
| COPD                            | 9,020 (20.0)  | 267 (14.4)   | <0.001 | 824 (14.8)   | 267 (14.4)   | 0.66 |
| Anemia                          | 21,179 (47.0) | 813 (43.7)   | 0.01   | 2,404 (43.3) | 812 (43.8)   | 0.75 |
| Cancer                          | 8,293 (18.4)  | 148 (8.0)    | <0.001 | 448 (8.1)    | 148 (8.0)    | 0.94 |
| SLE                             | 1,072 (2.4)   | 36 (1.9)     | 0.25   | 95 (1.7)     | 36 (1.9)     | 0.58 |

|                      |             |          |       |           |          |      |
|----------------------|-------------|----------|-------|-----------|----------|------|
| Rheumatoid arthritis | 1,199 (2.7) | 40 (2.2) | 0.20  | 108 (1.9) | 40 (2.2) | 0.64 |
| Systemic sclerosis   | 300 (0.7)   | 7 (0.4)  | 0.17  | 20 (0.4)  | 7 (0.4)  | 1    |
| Sjogren's syndrome   | 189 (0.4)   | 2 (0.1)  | 0.059 | 9 (0.2)   | 2 (0.1)  | 0.86 |
| IBD                  | 394 (0.9)   | 10 (0.5) | 0.16  | 20 (0.4)  | 10 (0.5) | 0.40 |

---

COPD, chronic obstructive pulmonary disease; COVID-19: Coronavirus disease 2019; HMO, health maintenance organization; IBD, inflammatory bowel disease; NA, not available; OSA, obstructive sleep apnea; SD, standard deviation; SLE, systemic lupus erythematosus

**Table S3. In-Hospital Outcomes.**

| Variables                     | Unmatched Cohort                    |                                  |                | Propensity-Matched Cohort           |                                  |                |
|-------------------------------|-------------------------------------|----------------------------------|----------------|-------------------------------------|----------------------------------|----------------|
|                               | Acute Pericarditis without COVID-19 | Acute Pericarditis with COVID-19 | <i>P</i> Value | Acute Pericarditis without COVID-19 | Acute Pericarditis with COVID-19 | <i>P</i> Value |
| <b>n</b>                      | 45,053                              | 1,860                            |                | 5,554                               | 1,856                            |                |
| <b>Outcomes</b>               |                                     |                                  |                |                                     |                                  |                |
| Death, n (%)                  | 3,298 (7.3)                         | 439 (23.6)                       | <0.001         | 418 (7.5)                           | 439 (23.7)                       | <0.001         |
| Cardiac arrest, n (%)         | 1,352 (3.0)                         | 110 (5.9)                        | <0.001         | 212 (3.8)                           | 110 (5.9)                        | <0.001         |
| Cardiogenic shock, n (%)      | 2,383 (5.3)                         | 108 (5.8)                        | 0.36           | 330 (5.9)                           | 107 (5.8)                        | 0.82           |
| Ventricular arrhythmia, n (%) | 2,617 (5.8)                         | 119 (6.4)                        | 0.31           | 372 (6.7)                           | 119 (6.4)                        | 0.71           |
| AKI, n (%)                    | 1,4513 (32.2)                       | 795 (42.7)                       | <0.001         | 1,822 (32.8)                        | 794 (42.8)                       | <0.001         |
| ARF, n (%)                    | 12,681 (28.1)                       | 947 (50.9)                       | <0.001         | 1,517 (27.3)                        | 946 (51.0)                       | <0.001         |
| ACHF, n (%)                   | 11,221 (24.9)                       | 308 (16.6)                       | <0.001         | 1,469 (26.4)                        | 308 (16.6)                       | <0.001         |
| Cardiac tamponade             | 4,622 (10.3)                        | 81 (4.4)                         | <0.001         | 556 (10.0)                          | 81 (4.4)                         | <0.001         |
| LOS (days)                    |                                     |                                  |                |                                     |                                  |                |
| Median (IQR)                  | 5.00 (7.00)                         | 8.00 (12.00)                     | <0.001         | 5.00 (7.00)                         | 8.00 (12.00)                     | <0.001         |
| Mean (SD)                     | 8.91 (13.78)                        | 13.19 (14.76)                    | <0.001         | 9.20 (14.45)                        | 13.13 (14.63)                    | <0.001         |
| Total charge (\$)             |                                     |                                  |                |                                     |                                  |                |
| Median (IQR)                  | 70,949 (121,748)                    | 94,761 (175,746)                 | <0.001         | 71,786 (127,005)                    | 93,998 (174,178)                 | <0.001         |
| Mean (SD)                     | 157,032 (318,074)                   | 207,620 (354,098)                | <0.001         | 168,917 (332,264)                   | 206,734 (353,520)                | <0.001         |

ACHF, acute congestive heart failure; AKI, acute kidney injury; ARF, acute respiratory failure; COVID-19: Coronavirus disease 2019; IQR, interquartile range; LOS, length of stay; SD, standard deviation.
